# Supplementary material
Source: publisher site journal article supplement (http://www.spandidos-publications.com/457/downloadSupplementary)
Supplement: Supplementary file 1 [file downloadSupplementary]

Figure S1. SMOX does not induce apoptosis. (A) Mono-parametric FCM analysis of 498 DNA content and (B) TUNEL assay of NP, NG and NS cell lines. Symbols for the DNA content: NP, grey-filled histogram; NG, black line; NS dashed line. Symbols for TUNEL: autofluorescence, grey-filled histogram; NP, black line; NG, dashed line; NS, grey line. The percentages of the sub-G1 cell population and the fold change of the mean fluorescence intensities of TUNEL assay in the cell population are plotted as Whisker boxes. Data were analysed by one-way ANOVA, followed by Tukey's post hoc test. No significant differences were found. NP cells. NP, N18TG2 cells transfected with pcDNA3; NS, N18TG2 cells transfected with pcDNA3/SMOX; NG, N18TG2 cells transfected with pcDNA3/ $\gamma$ SMO.

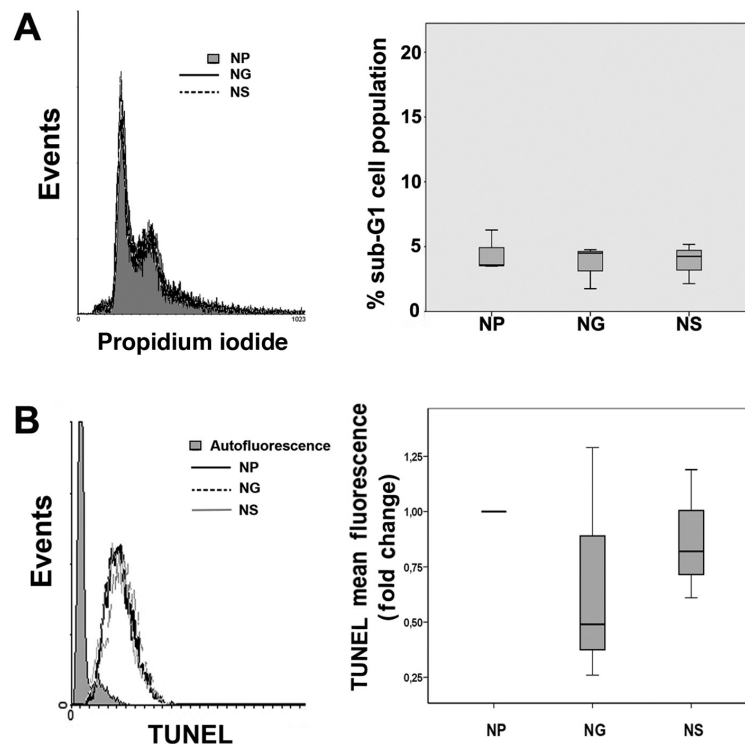

Figure S2. Semi-quantitative RT-PCR for BAK, BAX, AATF gene expression in NP, NG and NS cell lines and TG tissues. (A) Semi-quantitative RT-PCR quantification of BAK, BAX, PUMA and  $\beta$ -actin in NP, NS, NG cell lines, and in the presence of 50 and 100  $\mu$ M MDL as a SMOX inhibitor.  $\beta$ -actin was used as a housekeeping gene. (B) Expression of AATF, BAK, BAX and PUMA examined by RT-PCR in the brains, intestines and heart tissues from transgenic (TG) or syngeneic (SG) mice totally expressing SMOX. '-' and '+' represent negative and positive control of PCR reactions. NP, N18TG2 cells transfected with pcDNA3; NS, N18TG2 cells transfected with pcDNA3/SMOX; NG, N18TG2 cells transfected with pcDNA3/ $\gamma$ SMOX; SMOX, spermine oxidase; AATF, apoptosis antagonizing-factor BAK; Bcl-2 antagonist/killer; BAX, Bcl-2-associated X protein; PUMA, p53 upregulated modulator of apoptosis; MDL-72527, N,N'-Bis(2,3-butadienyl)-1,4-butanediamine dihydrochloride.

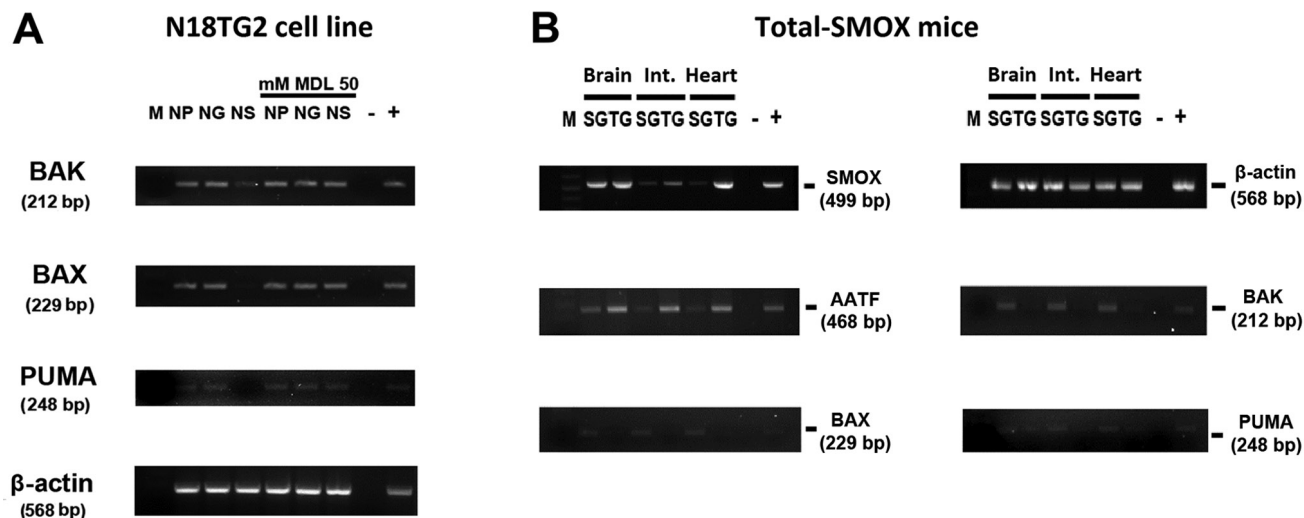

**Table SI. Specific sequences of primers.**

| <b>AATF<br/>PrimerBank ID<br/>NM_019816.1</b> | <b>Sequence (5'→3')</b>  | <b>Length</b> | <b>Tm</b> | <b>Location</b> | <b>Amplicon<br/>size</b> |
|-----------------------------------------------|--------------------------|---------------|-----------|-----------------|--------------------------|
| Forward primer                                | CGGAGCCAGTCCCTGAGCCT     | 20            | 63        | 1285-1304       | 468 bp                   |
| Reverse primer                                | GGAGGCAGCAGGTGGGTCCT     | 20            | 63        | 1733-1752       |                          |
| <b>PUMA<br/>PrimerBank ID<br/>18875398a1</b>  | <b>Sequence (5'→ 3')</b> | <b>Length</b> | <b>Tm</b> | <b>Location</b> | <b>Amplicon<br/>size</b> |
| Forward primer                                | AGCAGCACTTAGAGTCGCC      | 19            | 61.7      | 302-320         | 248 bp                   |
| Reverse primer                                | CCTGGGTAAGGGGAGGAGT      | 19            | 61.7      | 549-531         |                          |
| <b>BAX<br/>PrimerBank ID<br/>133778943c2</b>  | <b>Sequence (5'→ 3')</b> | <b>Length</b> | <b>Tm</b> | <b>Location</b> | <b>Amplicon<br/>size</b> |
| Forward primer                                | CCGGCGAATTGGAGATGAACT    | 21            | 62.5      | 189-209         | 229 bp                   |
| Reverse primer                                | CCAGCCCATGATGGTTCTGAT    | 21            | 61.9      | 417-397         |                          |
| <b>BAK<br/>PrimerBank ID<br/>6671612a1</b>    | <b>Sequence (5'→ 3')</b> | <b>Length</b> | <b>Tm</b> | <b>Location</b> | <b>Amplicon<br/>size</b> |
| Forward primer                                | GGTGACAAGTGACGGTGGTC     | 20            | 61        | 217-236         | 212 bp                   |
| Reverse primer                                | GTCCATCTCGGGGTTGGCAG     | 20            | 61        | 428-409         |                          |
